# Supplementary material
Source: publisher figshare collection journal article supplement (https://acs.figshare.com/ndownloader/files/23746632)
Supplement: Supplementary file 1 [file 23746632]

Supporting Information

**Oriented Synthesis of Pyridinic-N Dopant within the Highly  
Efficient Multifunction Carbon-Based Materials for Oxygen  
Transformation and Energy Storage**

Fantao Kong<sup>†</sup>, Yu Qiao<sup>†</sup>, Chaoqi Zhang<sup>†</sup>, Xiaohong Fan<sup>†</sup>, Qingbiao Zhao<sup>‡\*</sup>,

Aiguo Kong<sup>†\*</sup> and Yongkui Shan<sup>†\*</sup>

<sup>†</sup>School of Chemistry and Molecular Engineering, East China Normal University, Dongchuan Road No. 500, Minhang District, Shanghai 200241, P. R. China

<sup>‡</sup>Key Laboratory of Materials and Devices, Department of Electronic Science, East China Normal University, Dongchuan Road No. 500, Minhang District, Shanghai 200241, P. R. China

\*Corresponding author.

*E-mail address:*

agkong@chem.ecnu.edu.cn, ykshan@chem.ecnu.edu.cn, qbzha@ee.ecnu.edu.cn

Number of pages: 12

Number of figures: 7

Number of tables: 5

## CONTENTS

**Figure S1.** (A) N1s high-resolution XPS spectrum of the H-NCT<sub>B</sub>-2 along with the corresponding fitting curves; (B) The survey XPS spectrum of the NGT<sub>B</sub>-900.

**Figure S2.** (A, B) SEM images of the freeze-dried H-NGT<sub>B</sub> samples.

**Figure S3.** (A-E) LSV curves and electron transfer numbers (n) of the prepared GT-900, GT<sub>B</sub>-900, NGT<sub>B</sub>-800, -1000 samples and Pt/C with different rotating rate in O<sub>2</sub>-saturated 0.1 M KOH solution; (F) Comparison of electron transfer numbers of different samples.

**Figure S4.** Cyclic voltammetry (CV) of GT-900 (A), GT<sub>B</sub>-900 (B), NGT<sub>B</sub>-800 (C), NGT<sub>B</sub>-900 (D), and NGT<sub>B</sub>-1000 (E) with different scan rates from 10 to 100 mV·s<sup>-1</sup> in a non-faradic potential range of 1.04~1.14 V vs. RHE in 0.1 M KOH solution.

**Figure S5.** The electrocatalytic performance of the prepared catalysts for ORR in 0.1 M HClO<sub>4</sub> electrolyte.

**Figure S6.** The overall polarization curves of NGT<sub>B</sub>-900 and commercial Pt/C catalysts in O<sub>2</sub>-saturated 0.1 M KOH solution for ORR/OER.

**Figure S7.** The LSV curves of NGT<sub>B</sub>-900 for ORR using Hg/HgO or Ag/AgCl as reference electrode.

**Table S1.** Analysis of the nitrogen species in N-doped carbon-based metal-free catalysts reported in the literature.

**Table S2.** The surface element composition of NGT<sub>B</sub>-n from the XPS analysis.

**Table S3.** Comparison of ORR catalytic activity in 0.1 M KOH electrolyte with recently reported non-precious electrocatalysts in the literature.

**Table S4.** Comparison of the capacitive properties of the NGT<sub>B</sub>-900 electrode with those of other electrode materials reported in the literature.

**Table S5.** Comparison of the performances of Zn-air batteries with various N-doped electrocatalysts.

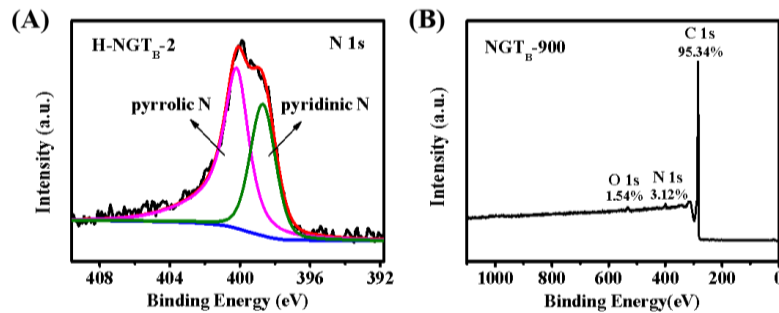

**Figure S1.** (A) N1s high-resolution XPS spectrum of the H-NCT<sub>B</sub>-2 along with the corresponding fitting curves; (B) The survey XPS spectrum of the NGT<sub>B</sub>-900.

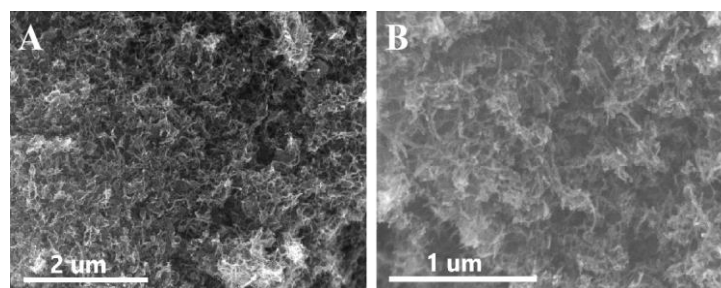

**Figure S2.** (A, B) SEM images of the freeze-dried H-NGT<sub>B</sub> samples.

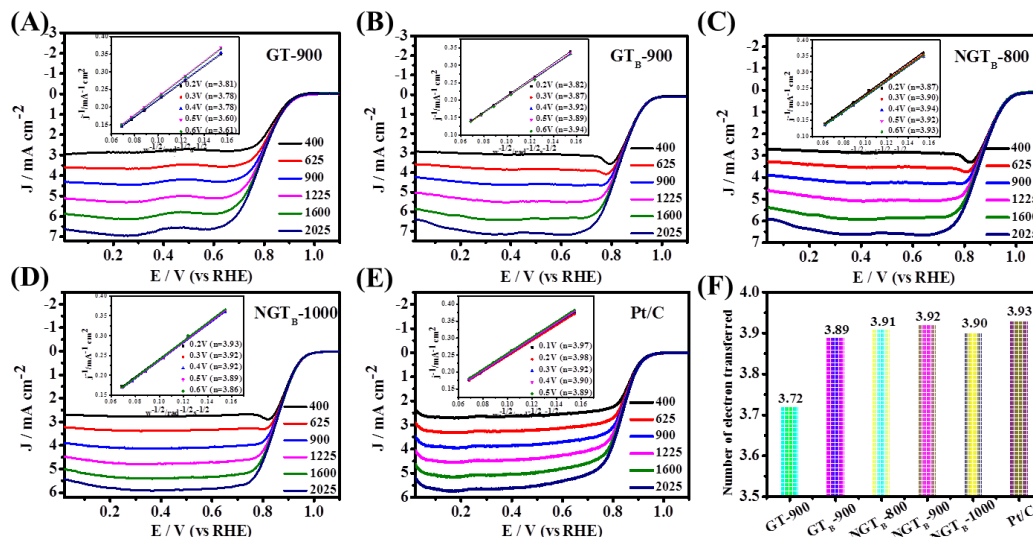

**Figure S3.** (A-E) LSV curves and electron transfer numbers (n) for the prepared GT-900, GT<sub>B</sub>-900, NGT<sub>B</sub>-800, -1000 samples and Pt/C with different rotating rate in O<sub>2</sub>-saturated 0.1 M KOH solution; (F) Comparison between numbers of electron transferred per O<sub>2</sub> in ORR on different samples.

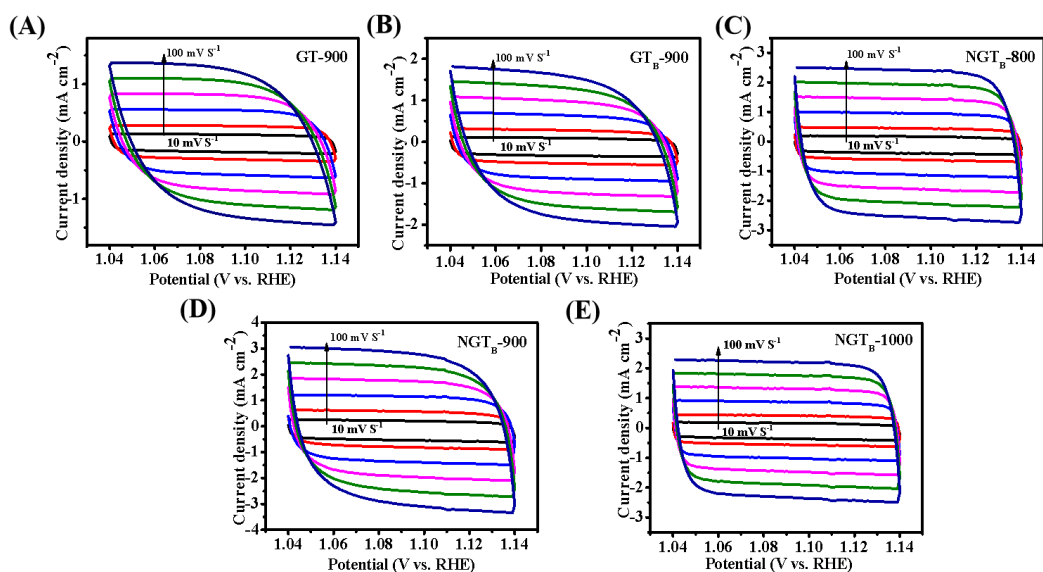

**Figure S4.** Cyclic voltammetry (CV) of GT-900 (A), GT<sub>B</sub>-900 (B), NGT<sub>B</sub>-800 (C), NGT<sub>B</sub>-900 (D), and NGT<sub>B</sub>-1000 (E) with different scan rates from 10 to 100 mV·s<sup>-1</sup> in a non-faradic potential range of 1.04~1.14 V vs. RHE in 0.1 M KOH solution.

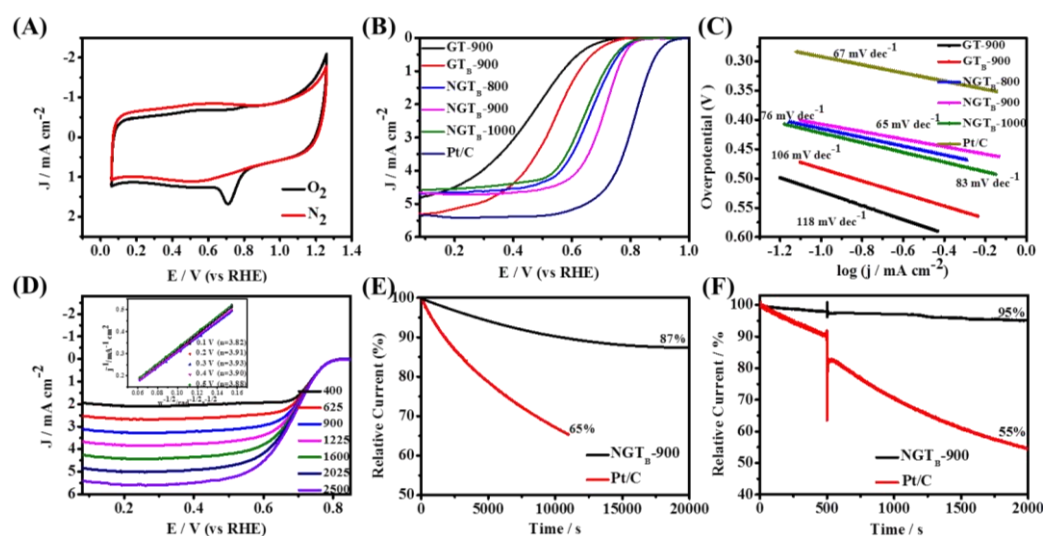

**Figure S5.** (A) CV curves of NGT<sub>B</sub>-900 and Pt/C in O<sub>2</sub>- or N<sub>2</sub>-saturated 0.1 M HClO<sub>4</sub> solution; (B) LSV polarization curves and (C) the corresponding Tafel slope curves of ORR on different samples in O<sub>2</sub>-saturated 0.1 M HClO<sub>4</sub> solution; (D) LSV curves and electron transfer number (n) of the prepared NGT<sub>B</sub>-900 with different rotating rate in O<sub>2</sub>-saturated 0.1 M HClO<sub>4</sub> solution; (E) Current-time (i-t) chronoamperometric response of NGT<sub>B</sub>-900 and Pt/C-JM

in O<sub>2</sub>-saturated 0.1 M HClO<sub>4</sub> at a rotation rate of 1600 rpm on the RDE electrode; (F) Current-time (i-t) chronoamperometric response of NGT<sub>B</sub>-900 and Pt/C-JM with the addition of methanol (3 wt %) in O<sub>2</sub>-saturated 0.1 M HClO<sub>4</sub> solution at a rotation rate of 1600 rpm on the RDE electrode.

The electrocatalytic performance of the prepared catalysts for ORR was also evaluated in 0.1 M HClO<sub>4</sub> electrolyte. As shown in Figure 6A, a well-defined cathodic redox peak can be observed at 0.71 V (vs. RHE) on the NGT<sub>B</sub>-900 in O<sub>2</sub>-saturated 0.1 M HClO<sub>4</sub> solution, but no evident peak is recorded in N<sub>2</sub>-saturated solution, which exhibits the effective ORR activity of NGT<sub>B</sub>-900 in acidic condition. LSV curves in Figure 6B show that NGT<sub>B</sub>-900 possesses superior ORR activity with a half-wave potential of 0.70 V, which is more positive than those on GT-900 (0.46 V), GT<sub>B</sub>-900 (0.53 V), NGT<sub>B</sub>-800 (0.66 V), NGT<sub>B</sub>-1000 (0.64 V) and close to that on the commercial Pt/C (0.80 V). Actually, the electrocatalytic activity of NGT<sub>B</sub>-900 toward ORR in acidic solution also shows advantages over the most of N-doped carbon materials reported in literature.<sup>1-4</sup> In the corresponding Tafel curves (Figure. 6C), Tafel slope (65 mV dec<sup>-1</sup>) of ORR on NGT<sub>B</sub>-900 is smaller than those on GT-900 (118 mV dec<sup>-1</sup>), GT<sub>B</sub>-900 (106 mV dec<sup>-1</sup>), NGT<sub>B</sub>-800 (76 mV dec<sup>-1</sup>), NGT<sub>B</sub>-1000 (83 mV dec<sup>-1</sup>) and Pt/C (67 mV dec<sup>-1</sup>), indicating a quicker reaction rate on the NGT<sub>B</sub>-900. The limit current density of ORR on NGT<sub>B</sub>-900 increases with the rate of rotation (Figure 6D). The linearly fitted K-L plots were obtained based on the K-L equation (inset of Figure 6D), illustrating similar electron transfer mechanism for ORR at the various potentials and a first-order reaction kinetic relative to the concentration of dissolved O<sub>2</sub>. In the potential range of 0.1-0.5 V, the average numbers (n) of electron transferred is ~3.90, implying that NGT<sub>B</sub>-900 undergoes a nearly 4e<sup>-</sup> oxygen reduction reaction pathway. As demonstrated in Figure 6E, NGT<sub>B</sub>-900 shows a long-term durability with 87% retention of initial current density after 20,000 s, which is superior to that on Pt/C (65% retention of initial current density after 10,000 s).

The NGT<sub>B</sub>-900 also shows a good methanol tolerance in acidic solution (Figure 6F), as evidenced by almost no change in the current density after injection of 3% methanol at the time node of 500s, while a remarkable decline (~45%) can be observed in the current density of ORR on Pt/C electrode, which is resulted from the toxic effect of methanol.

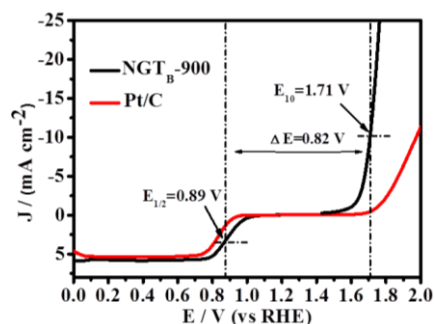

**Figure S6.** The overall polarization curves of NGT<sub>B</sub>-900 and commercial Pt/C catalysts in O<sub>2</sub>-saturated 0.1 M KOH solution for ORR/OER.

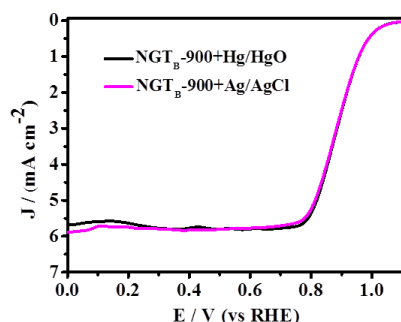

**Figure S7.** The LSV curves of NGT<sub>B</sub>-900 for ORR using Hg/HgO or Ag/AgCl as reference electrode.

The contrast experiments were carried out to investigate the electrocatalytic activity of NGT<sub>B</sub>-900 catalyst for ORR using a Hg/HgO as a reference electrode. As can be seen from Figure S7, the difference of ORR activity on NGT<sub>B</sub>-900 catalyst using Hg/HgO as reference electrode from that using Ag/AgCl as reference electrode is negligible in 0.1 M KOH solution. This result confirms that Ag/AgCl electrode is stable and suitable in alkaline medium.

**Table S1.** Analysis of the nitrogen species in N-doped carbon-based metal-free catalysts reported in the literature.

| Methods                                                                                                                                      | N functional groups (%) |       |       |       | Refs.                                       |
|----------------------------------------------------------------------------------------------------------------------------------------------|-------------------------|-------|-------|-------|---------------------------------------------|
|                                                                                                                                              | N1                      | N2    | N3    | N4    |                                             |
| CVD (3.1 at.%)                                                                                                                               | 62.0%                   | 38.0% | —     | —     | J. Catal. 311 (2014) 80-87                  |
| ball milling (3.15 at.%)                                                                                                                     | 21.3%                   | 73.1% | 5.6%  | —     | J. Power Sources 342 (2017) 157-164.        |
| plasma discharge (4.1 at.%)                                                                                                                  | 10.0%                   | —     | 73.2% | 16.8% | Carbon 100 (2016) 337-344                   |
| arc-discharge (6.5 at.%)                                                                                                                     | 40.0%                   | 46.2% | —     | 13.8% | Appl. Surf. Sci. 277 (2013) 88-93           |
| solvothermal (6.34 at.%)                                                                                                                     | 32.8%                   | 41.9% | 25.3% | —     | Int. J. Hydrogen Energy 39 (2014) 6845-6852 |
| wet chemical method (7.65 at.%)                                                                                                              | 35.4%                   | 39.6% | 17.6% | 7.4%  | J. Power Sources 227 (2013) 185-190         |
| thermal annealing (2.9 at.%)                                                                                                                 | 44.8%                   | 13.8% | 20.7% | 20.7% | Sci. Adv. 1 (2015) e1400129                 |
| ion sputtering (0.7 at.%)                                                                                                                    | 95.0%                   | —     | 5.0%  | —     | Science 351 (2016) 361-365                  |
| this method (3.12 at.%)                                                                                                                      | 84.3%                   | —     | 15.7% | —     | This work                                   |
| Notes : N1, Pyridinic-N; N2, Pyrrolic-N; N3, Graphitic-N; N4, Oxidized nitrogen. Figures in parenthesis refer to the total nitrogen content. |                         |       |       |       |                                             |

**Table S2.** The surface element composition of NGT<sub>B</sub>-n from the XPS analysis.

| Samples                | Element composition (at. %) |      |      |
|------------------------|-----------------------------|------|------|
|                        | C                           | O    | N    |
| NGT <sub>B</sub> -800  | 93.76                       | 1.78 | 4.46 |
| NGT <sub>B</sub> -900  | 95.34                       | 1.54 | 3.12 |
| NGT <sub>B</sub> -950  | 97.29                       | 1.03 | 1.68 |
| NGT <sub>B</sub> -1000 | 98.45                       | 0.68 | 0.87 |

**Table S3.** Comparison of ORR catalytic activity in 0.1 M KOH electrolyte with recently reported non-precious electrocatalysts in the literature.

| Catalysts             | Electrolyte | E <sub>onset</sub> | E <sub>1/2</sub> (V) | Ref.                                             |
|-----------------------|-------------|--------------------|----------------------|--------------------------------------------------|
| NGT <sub>B</sub> -900 | 0.1 M KOH   | 1.06               | 0.89                 | This work                                        |
| NCN-1000-5            | 0.1 M KOH   | 0.95               | 0.82                 | Energy Environ. Sci.<br>2019, 12, 322-333        |
| NOGB-800              | 0.1 M KOH   | 0.92               | 0.84                 | Adv. Energy Mater.<br>2019, 1803867              |
| NHC                   | 0.1 M KOH   | —                  | 0.88                 | Nano Res. 2017, 10(4):<br>1163-1177              |
| CF-K-A                | 0.1 M KOH   | —                  | 0.835                | Small 2018, 14(21),<br>1800563                   |
| N-HPCNSs-800          | 0.1 M KOH   | 1.00               | 0.887                | Nano Energy 49<br>(2018) 393-402                 |
| LHNHPC                | 0.1 M KOH   | 0.98               | 0.86                 | Appl. Catal. B-<br>Environ., 210 (2017)<br>57-66 |
| NPC-1000              | 0.1 M KOH   | 1.02               | 0.90                 | Adv. Funct. Mat., 27<br>(2017) 1606190           |
| NDCF(Zn)-H2           | 0.1 M KOH   | 1.01               | 0.88                 | Small 2019, 15,<br>1805325                       |
| NDC-900               | 0.1 M KOH   | 0.86               | 0.76                 | J Mater Chem A.<br>2017;5(13):6025-6031.         |
| 1100-CNS              | 0.1 M KOH   | 0.94               | 0.85                 | Energy Environ. Sci.<br>2017;10(3):742-749       |
| NPMC-1000             | 0.1 M KOH   | 0.94               | 0.85                 | Nat. Nanotech.<br>2015;10(5):444-452             |
| NCF-900               | 0.1 M KOH   | 1.05               | 0.89                 | J. Mater. Chem. A,<br>2018, 6, 7762-7769         |
| 3D NCNT array         | 0.1 M KOH   | 0.93               | 0.81                 | Nano Energy 2017, 37,<br>98-107                  |



**Table S4.** Comparison of the electrochemical performance of the NGT<sub>B</sub>-900 electrode with performances of previously reported electrodes in 6 M KOH electrolyte.

| Electrode materials | Surface area (m <sup>2</sup> g <sup>-1</sup> ) | Specific capacitance (F g <sup>-1</sup> ) | Rate capability              | Cycling       | Ref.                                         |
|---------------------|------------------------------------------------|-------------------------------------------|------------------------------|---------------|----------------------------------------------|
| N-OMCS              | 439                                            | 288 (1 A g <sup>-1</sup> )                | 66% at 50 A g <sup>-1</sup>  | 100% (20000s) | Carbon, 2018, 127, 85-92                     |
| N-CNF               | 563                                            | 202 (1 A g <sup>-1</sup> )                | 82% at 30 A g <sup>-1</sup>  | 97% (3000s)   | ACS Nano 6 (2012) 7092-7102                  |
| graphene            | 2582                                           | 186 (1 A g <sup>-1</sup> )                | 58% at 10 A g <sup>-1</sup>  | 93% (4000s)   | Adv. Mater. 28 (2016) 5222-5228              |
| N-MCS               | 2095                                           | 203 (1 A g <sup>-1</sup> )                | 95% at 20 A g <sup>-1</sup>  | 100% (5000)   | Nat. Commun. 6 (2015) 7221                   |
| N,S-OMC             | 1021                                           | 167 (1 A g <sup>-1</sup> )                | 60% at 50 A g <sup>-1</sup>  | 97% (1000s)   | J. Mater Chem. A 1 (2013) 7584-7591          |
| OMC                 | 781                                            | 157 (0.5 A g <sup>-1</sup> )              | 80% at 6 A g <sup>-1</sup>   | 97% (20000s)  | Nanoscale 6 (2014) 14657-14661               |
| B-OMC               | 957                                            | 250 (1 A g <sup>-1</sup> )                | 60% at 5 A g <sup>-1</sup>   | 92% (10000s)  | Electrochim Acta 207 (2016)266-274           |
| NPCs                | 806                                            | 323 (1 A g <sup>-1</sup> )                | 54% at 100 A g <sup>-1</sup> | —             | ACS Sustainable Chem. Eng., 2016, 4, 177-187 |
| NPC□F               | 1375                                           | 364 (0.6 A g <sup>-1</sup> )              | 55% at 10 A g <sup>-1</sup>  | —             | Adv. Mater., 2016, 28, 1981-1987             |
| HNPCs               | 3700                                           | 289 (0.5 A g <sup>-1</sup> )              | 72% at 20 A g <sup>-1</sup>  | —             | J. Mater. Chem. A, 2017, 5, 12958-12968      |
| GF□NG               | 583                                            | 380 (0.6 A g <sup>-1</sup> )              | 63% at 80 A g <sup>-1</sup>  | —             | Adv. Mater., 2017, 29, 1701677               |
| NGT <sub>B</sub>    | 1505                                           | 456 (1 A g <sup>-1</sup> )                | 76% at 50 A g <sup>-1</sup>  | 94.5% (3000s) | This work                                    |

**Table S5.** Comparison of the performance of Zn-air batteries with various N-doped electrocatalysts.

| Catalyst    | Specific Capacity<br>(mAh g <sub>Zn</sub> <sup>-1</sup> ) | Energy Density<br>(Wh g <sub>Zn</sub> <sup>-1</sup> ) | Current density<br>(mA cm <sup>-2</sup> ) | Ref.                                               |
|-------------|-----------------------------------------------------------|-------------------------------------------------------|-------------------------------------------|----------------------------------------------------|
| SilkNC/KB   | 614.7                                                     | 727.6                                                 | 20                                        | Chem. Mater., 2019, 31<br>1023-1029                |
| BRCAC8502   | 732                                                       | ----                                                  | 10                                        | ACS Sustain. Chem. Eng.,<br>2019, 7, 17039-17046   |
| NCN@CF2-950 | 720.5                                                     | 900                                                   | 10                                        | ChemElectroChem, 2019, 6,<br>2924-2930             |
| DCM-1000    | 815                                                       | 915.46                                                | 50                                        | Carbon, 2019, 145, 38-46                           |
| g-CN-CNF    | 363                                                       | 388                                                   | 10                                        | Appl. Catal. B: Environ.,<br>2018, 237, 140-148    |
| NDGs-800    | 751                                                       | 872.3                                                 | 10                                        | ACS Energy Lett., 2018, 3,<br>1183-1191            |
| GSC-900     | 685                                                       | 817                                                   | 10                                        | Energy, 2018, 143, 43-55                           |
| NPBC        | 760                                                       | 850                                                   | 5                                         | Electrochim. Acta, 2017, 257,<br>250-258           |
| DN-CP@G     | 591                                                       | ---                                                   | 20                                        | Adv. Energy Mater., 2018, 8,<br>1703539            |
| PAP-NCNCs   | 728                                                       | 908                                                   | 10                                        | J. Mater. Chem. A, 2017, 5,<br>519-523             |
| NDG         | 780                                                       | ---                                                   | 50                                        | ACS Appl. Mater. Interfaces,<br>2017, 9, 7125-7130 |
| BHPC-950    | 797                                                       | 963                                                   | 20                                        | Adv. Funct. Mater., 2017, 27,<br>1701971           |
| A-EPC-900   | 669                                                       | ---                                                   | 5                                         | Chem. Commun, 2015, 51,<br>8841-88442              |

|                       |     |      |    |                                          |
|-----------------------|-----|------|----|------------------------------------------|
| NCNF-1000             | 626 | 776  | 10 | Adv Mater, 2016, 28,<br>3000-3006        |
| N-CNF                 | 615 | 760  | 10 | Nano Energy, 2015, 11,<br>366-376        |
| HPNSC                 | 804 | 1007 | 10 | J. Mater. Chem. A, 2019, 7,<br>9831-9836 |
| NGT <sub>B</sub> -900 | 813 | 1008 | 10 | This work                                |

---

## References

- (1) Shui, J. L.; Wang, M.; Du, F.; Dai, L. M., N-doped carbon nanomaterials are durable catalysts for oxygen reduction reaction in acidic fuel cells. *Sci. Adv.* **2015**, *1*, e1400129. [DOI:10.1126/sciadv.1400129](https://doi.org/10.1126/sciadv.1400129)
- (2) Ye, L.; Chai, G. L.; Wen, Z. H., Zn-MOF-74 Derived N-Doped Mesoporous Carbon as pH-Universal Electrocatalyst for Oxygen Reduction Reaction. *Adv. Funct. Mater.* **2017**, *27*, 1606190. [DOI:10.1002/adfm.201606190](https://doi.org/10.1002/adfm.201606190)
- (3) Yazdi, A. Z.; Roberts, E. P. L.; Sundararaj, U., Nitrogen/sulfur co-doped helical graphene nanoribbons for efficient oxygen reduction in alkaline and acidic electrolytes. *Carbon* **2016**, *100*, 99-108. [DOI:10.1016/j.carbon.2015.12.096](https://doi.org/10.1016/j.carbon.2015.12.096)
- (4) Mamtani, K.; Jain, D.; Dogu, D.; Gustin, V.; Gunduz, S.; Co, A. C.; Ozkan, U. S., Insights into oxygen reduction reaction (ORR) and oxygen evolution reaction (OER) active sites for nitrogen-doped carbon nanostructures (CNx) in acidic media. *Appl. Catal. B-Environ.* **2018**, *220*, 88-97. [DOI: 10.1016/j.apcatb.2017.07.086](https://doi.org/10.1016/j.apcatb.2017.07.086)
